# Supplementary material
Source: PubMed Central journal article supplement (PMC7985817)
Supplement: jamaneurol-e210306-s001.pdf [file jamaneurol-e210306-s001.pdf]

## Supplementary Online Content

Li Y, Thompson WK, Reuter C, et al. Rates of incidental findings in brain magnetic resonance imaging in children. *JAMA Neurol*. Published online March 22, 2021. doi:10.1001/jamaneurol.2021.0306

**eFigure.** Twenty Category 4 Studies

**eTable 1.** IFs by Zygoty

**eTable 2.** IRR Analyses Included Three Families of Two Siblings Each

This supplementary material has been provided by the authors to give readers additional information about their work.

**eFigure:** Twenty Category 4 studies included a-g) 7 mass-like regions of signal abnormality concerning for glial neoplasm, h-m) 6 cases of hydrocephalus, n-p) 3 cases of severe Chiari I malformation with cerebellar tonsillar descent 15-24 mm below the foramen magnum, two of which demonstrated associated syrinx, q) 1 case of offset of the lateral masses of C1 and C2, suggestive of instability at the craniocervical junction, r) 1 sellar/suprasellar mass likely representing an adamantinomatous craniopharyngioma, s) 1 case of diffuse supratentorial white matter signal abnormality concerning for a toxic/metabolic process, t) 1 large multi-cystic mass in the right masticator space.

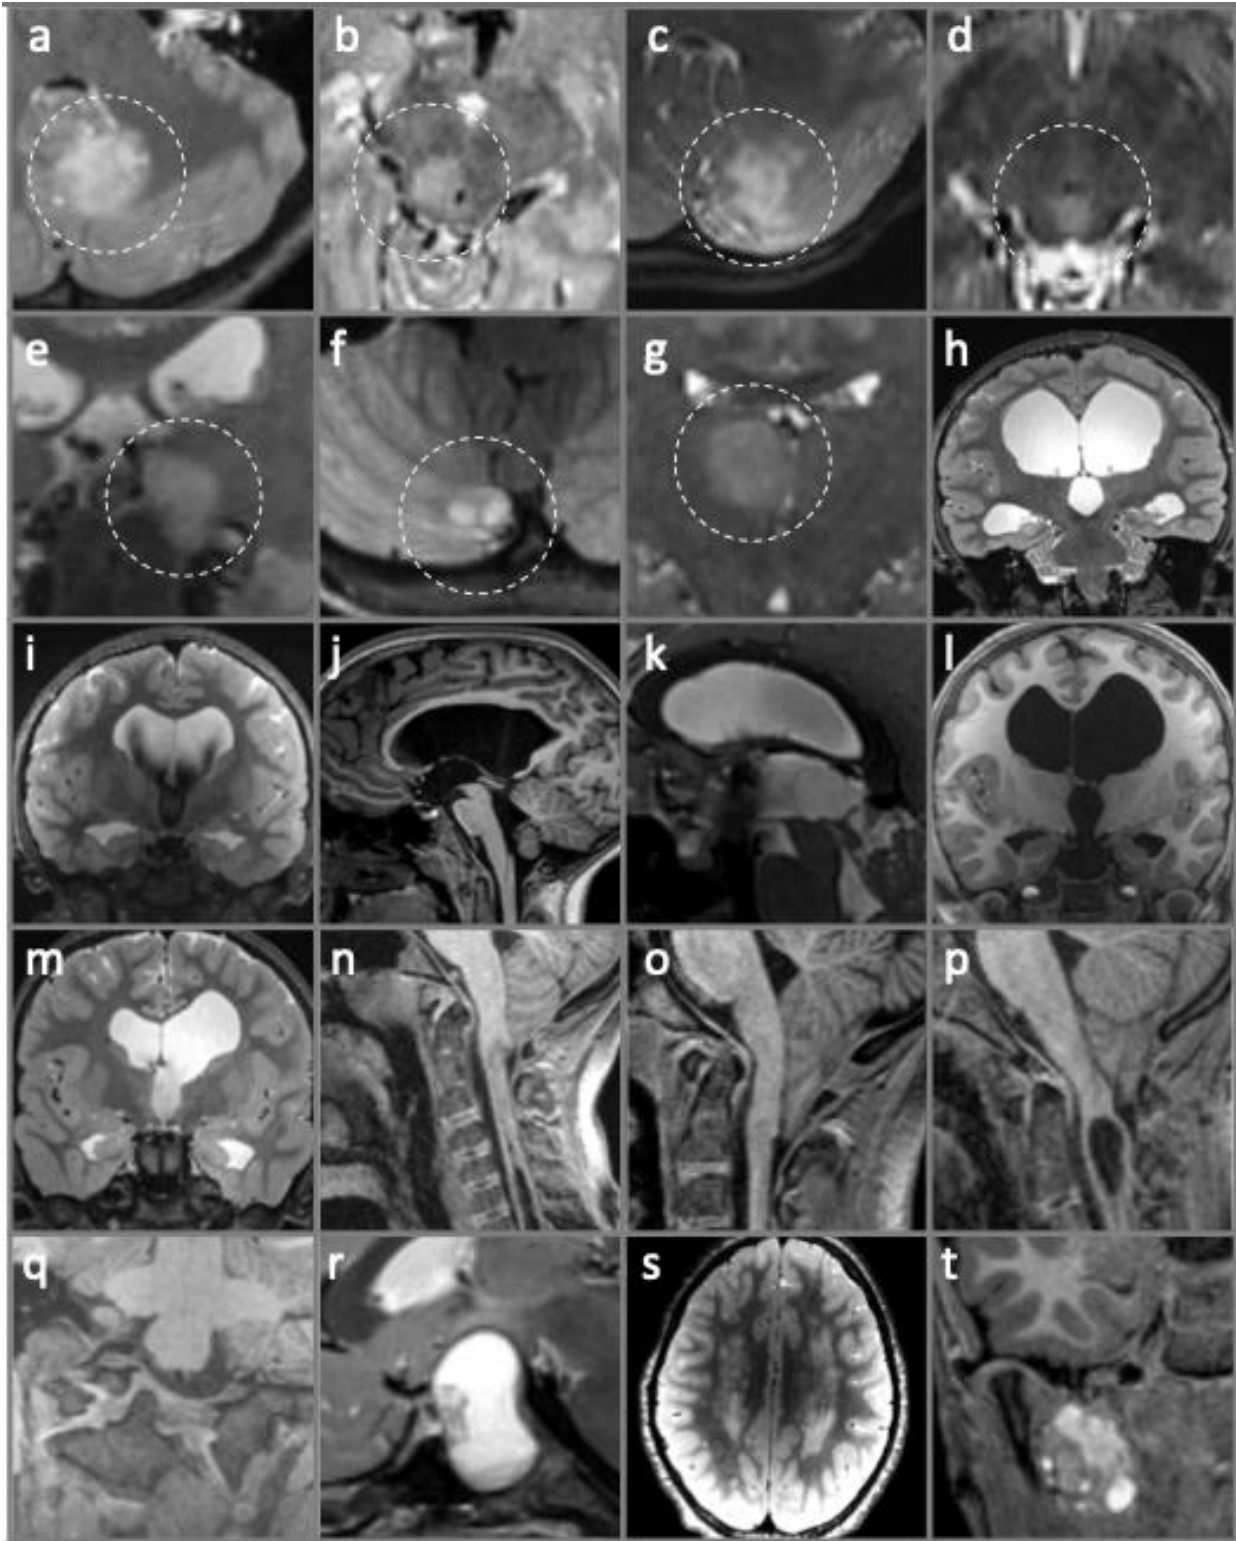

**eTable 1.** IFs by zygosity, A) Overall rates of incidental findings do not differ by zygosity. B) Pearson's chi squared analysis examining frequency of twin pairs with concordant IF scores for Category 1 (normal) or Categories 2-4 (with IFs). There was no enrichment for concordant scores in the monozygotic compared to dizygotic twin pairs.

A)

|                     | Dizygotic      | Missing    | Monozygotic | p-value |
|---------------------|----------------|------------|-------------|---------|
| N                   | 1042           | 263        | 708         | 0.076   |
| IF category 2-4 (%) | 226<br>(21.7%) | 74 (28.1%) | 157 (22.2%) |         |

B)

|             | Category 1 | Category 2,3,4 | p-value |
|-------------|------------|----------------|---------|
| Dizygotic   | 287        | 32             | 0.619   |
| Monozygotic | 219        | 29             |         |

**eTable 2.** IRR analyses included three families of two siblings each. To control for any potential bias introduced by relatedness we repeated the recommendation-for-referral agreement analyses eight times, each time retaining one member of the three families.

| <b>Cohen's Kappa</b> | <b>Tetrachoric Correlation</b> | <b>Stuart Maxwell Test p-value</b> |
|----------------------|--------------------------------|------------------------------------|
| 0.833                | 0.969                          | 0.134                              |
| 0.823                | 0.966                          | 0.09                               |
| 0.823                | 0.964                          | 0.225                              |
| 0.813                | 0.961                          | 0.157                              |
| 0.832                | 0.969                          | 0.134                              |
| 0.822                | 0.966                          | 0.09                               |
| 0.822                | 0.964                          | 0.225                              |
| 0.812                | 0.960                          | 0.157                              |
| Range: 0.812-0.833   | Range: 0.960-0.969             | Range: 0.09-0.225                  |
